# Supplementary material
Source: PubMed Central journal article supplement (PMC5717152)
Supplement: JB.00536-17_zjb001184608s1.pdf [file JB.00536-17_zjb001184608s1.pdf]

## SUPPLEMENTARY MATERIAL

A single-cell view of the BtsSR/YpdAB pyruvate sensing network in *Escherichia coli* and its biological relevance

Cláudia Vilhena,<sup>a</sup> Eugen Kaganovitch,<sup>b</sup> Jae Yen Shin,<sup>a\*</sup> Alexander Grünberger,<sup>b\*</sup> Stefan Behr,<sup>a\*</sup> Ivica Kristoficova,<sup>a</sup> Sophie Brameyer,<sup>a\*</sup> Dietrich Kohlheyer,<sup>b</sup> Kirsten Jung,<sup>a,#</sup>

Munich Center for Integrated Protein Science (CIPSM) at the Department of Microbiology, Ludwig-Maximilians-Universität München, Martinsried, Germany<sup>a</sup>; Institute for Bio- and Geosciences, IBG-1: Biotechnology, Forschungszentrum Jülich GmbH, Jülich, Germany<sup>b</sup>

Running Head: Phenotypic heterogeneity in *E. coli*

#Address correspondence to Kirsten Jung, [jung@lmu.de](mailto:jung@lmu.de)

\*Present address: Alexander Grünberger, Multiscale Bioengineering, Bielefeld University, Universitätsstraße 25, 33615 Bielefeld; Stefan Behr, Roche Diagnostics GmbH, Nonnenwald 2 82377 Penzberg; Jae Yen Shin, MPI of Biochemistry, Am Klopferspitz 18 82152 Martinsried; Sophie Brameyer, University College London, Gower Street, WC1E 6EA London

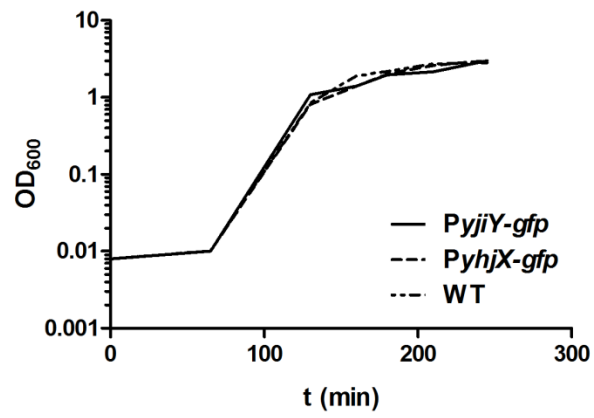

**FIG S1** Growth of reporter strains. *E. coli* cells expressing *gfp* under the control of  $P_{yhjX}$  or  $P_{yjiY}$  and the MG1655 strain (WT, without promoter-*gfp* fusion) were grown in LB medium.

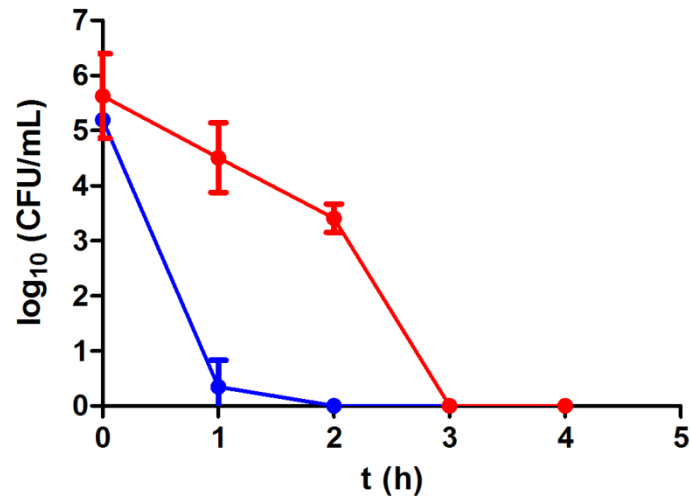

**FIG S2** Determination of the minimum duration of killing (MDK) after ofloxacin treatment. *E. coli* cells of either WT (blue line) or mutant  $\Delta btsSRypdAB$  (red line) were grown in LB-medium. At the post-exponential growth phase cells were challenged with ofloxacin (5  $\mu$ g/ml). Samples were taken and analyzed for colony forming units (CFUs). The MDK<sub>99</sub> value was taken as the time needed to kill 99% of the initial population. Experiments were performed three independent times and error bars indicate the standard deviations of the means.

| STRAINS                                    | - INDUCER |     | + INDUCER |      |
|--------------------------------------------|-----------|-----|-----------|------|
|                                            | Cells (%) |     | Cells (%) |      |
|                                            | OFF       | ON  | OFF       | ON   |
| WT GFP (IPTG)                              | 92.7      | 7.3 | 3.1       | 96.9 |
| <i>btsSRypdAB</i> GFP (IPTG)               | 97.8      | 2.2 | 51.0      | 49.0 |
| WT GFP-DppA (Arabinose)                    | 94.9      | 5.1 | 24.4      | 75.6 |
| <i>btsSRypdAB</i><br>GFP-DppA (Arabinose)  | 98.1      | 1.9 | 99.4      | 0.6  |
| WT LysP-mCherry (Arabinose)                | 97.7      | 2.3 | 33.4      | 66.6 |
| <i>btsSRypdAB</i> LysP-mCherry (Arabinose) | 98.2      | 1.8 | 98.5      | 1.5  |

**TABLE S1** The BtsSR/YpdAB network promotes overproduction of proteins. *E. coli* cells of either WT or the *btsSRypdAB* mutant harboring an overproduction vector with IPTG inducible promoter for the overproduction of GFP; an arabinose inducible promoter for the overproduction of DppA-GFP and an arabinose inducible promoter for the overproduction of LysP-mCherry were grown in LB medium. Samples were taken before (- inducer) and after (+ inducer) the addition of the inducer. Flow cytometry was used to count fluorescent cells (maximum of 2000

events), and the percentages of OFF (non-fluorescent cells) and ON cells (fluorescent cells) were calculated from the raw data. Experiments were performed three independent times and standard deviations were below 10%.
